# Supplementary material for: Functional identification of a Streptomyces lividans FKBP-like protein involved in the folding of overproduced secreted proteins
Source: Open Biol. 2019 Oct 30;9(10):190201. doi: 10.1098/rsob.190201 (PMC6833217; doi:10.1098/rsob.190201)
Supplement: Table S1 [file rsob190201supp2.xls]

## Sheet: Hoja1
Table S1. Proteins analysed by the Selected Reaction Monitoring experiment (SRM/MRM)
Protein	Annotated function	Secretory pathway	Number of peptides	Relative protein abundance
Secreted proteins potentially isomerised				△fkbpbio1	△fkbpbio2	△fkbpbio3	pFDTbio1	pFDTbio2	pFDTbio3	pFDTFKBPbio1	pFDTFKBPbio2	pFDTFKBPbio3
SLI01600	Glycoside hydrolase, family 43	Tat	2	0	0	0	7305	21914	17013	35094	39370	15320
SLI03045	Uncharacterised protein, N-acetylmuramoyl-L-alanine amidase	Sec	3	0	0	0	23784	28059	20574	75529	75970	22091
SLI03130	Alpha/Beta hydrolase fold protein	Sec	1	0	0	0	39542	107699	44719	131364	132251	85070
SLI03390	Amidase	Tat	3	713	713	712	9530	13894	4364	145258	23606	8461
SLI04830	Metallopeptidase	Sec	3	0	8906	0	163072	419209	160397	202614	209561	195139
SLI04955	Soluble quinoprotein glucose/sorbosone	Sec	2	0	0	891	100120	247544	89258	289780	449040	157903
SLI06140	Beta-galactosidase (Lactase)	Tat	1	0	0	1960	12468	25026	19598	29485	42313	17994
SLI07045	Ser/Thr with concanavalin A-like	Sec	3	0	0	0	0	0	0	0	0	0
SLI07140	Esterase	Sec	3	123081	430260	5433	2764779	4371477	6615382	4723054	6624691	5102020
SLI07150	Uncharacterized protein	Tat	3	4631	20130	0	97165	158267	141352	78907	289651	252540
SLI07590	Peptidase S1A, chymotrypsin family	Sec	3	210854	380555	10957	1200800	4123122	5383217	3688990	5251615	4515663
SLI08115	Alpha-1,2-mannosidase, putative	Sec	3	0	0	0	68592	88704	59057	292453	264742	72229
SLI09630	Peptidase S1 PA clan	Tat	1	0	0	0	56121	58348	42926	29478	53257	66989
SLI10325	Peptidase	Sec	2	8730	6236	0	14251	27164	57979	63691	57724	46588
SLI12065	Solute binding protein	Sec	2	1425	1960	0	59773	70991	16030	40709	46499	21820
SLI14975	Secreted Endopeptidase NLPC/P60	Tat	2	7659	4987	0	49787	106268	120960	220827	286922	106788
SLI19350	Protein of unknown function contatining DUF839 domain	Tat	1	0	0	0	14609	14966	12647	12201	41333	32240
SLI19735	Glycoside hydrolase/deacetylase	Sec	3	7750	17278	0	485303	627429	262418	431605	677783	442901
SLI22430	Esterase	Sec	3	18282	60008	0	6154395	11368079	7510615	11671886	13067952	6323003
SLI23095	Peptidase M6, InhA family protein	Tat	3	0	0	0	385916	503363	147890	651104	455451	165619
SLI23745	Beta-N-acetylhexosaminidase	Tat	3	0	0	0	0	0	0	0	0	0
SLI25270	Unknown function with Tachylectin 2 domain	Sec	1	0	0	0	25789	47322	21037	34302	35971	30045
SLI25665	Aldose 1-epimerase	Tat	2	0	0	0	13270	17276	5926	42818	43818	9430
SLI26155	N-acetylmuramoyl-L-alanine amidase	Tat	2	31047	17364	0	189288	274843	334589	614568	510972	318972
SLI27125	N-acetylmuramoyl- L-alanine amidase with Tachylectin 2 domain	Sec	3	12269	9016	0	734846	928076	240113	732266	1054198	363813
SLI29775	Glycosyl hydrolase-like 10 ( UPFUPF0748-like protein)	Tat	3	0	0	0	254169	388463	144568	172042	221453	153584
SLI31645 (tap2)	Trypeptidyl aminopeptidase	Sec	3	0	0	0	48084	56182	37473	120853	55262	34803
SLI33140	Alpha-1,2-mannosidase, putative protein	Sec	1	0	0	0	0	0	0	0	0	0
SLI34120 (sti)	Probable subtilase-type protease inhibitor	Sec	1	187830	909849	32557	1200026	1710841	1362812	1514247	1827379	1031229
SLI34355	Glycosyl hydrolase	Tat	1	0	0	0	0	0	0	0	0	0
SLI34825	Glycosyl hydrolase, five-bladed beta-propellor domain	Tat	2	0	0	0	115536	134954	43076	58603	106850	61771
SLI29545	Peptidyl-prolyl cis-trans isomerase	Tat	3	5176	5842	0	455708	548749	112587	634542	1023967	251592
Post-translocational modification proteins
SLI18490	Putative Copper chaperone SCO1/SenC	Sec	3	10349	42408	0	808232	758487	1109326	2015543	1896553	2174659
Sli-DsbA	Thioredoxin-like protein	Sec	3	0	0	0	0	0	0	0	0	0
Sli-DsbC	Thioredoxin-like protein	Tat	3	0	0	0	0	0	0	0	0	0
HtrA1	HtrA-like protease	Sec	3	0	0	28550	66436	119710	80725	129060	113199	57088
